# Supplementary material for: Unraveling Therapeutic Opportunities and the Diagnostic Potential of microRNAs for Human Lung Cancer
Source: MDPI journal article supplement (doi:10.3390/pharmaceutics15082061), 2023-07-31
Supplement: s1 [file s1]

Supplementary materials

# Unraveling Therapeutic Opportunities and the Diagnostic Potential of microRNAs for Human Lung Cancer

Osama Sweef <sup>1,2,\*</sup>, Elsayed Zaabout <sup>3</sup>, Ahmed Bakheet <sup>1</sup>, Mohamed Halawa <sup>4</sup>, Ibrahim Gad <sup>5</sup>, Mohamed Akela <sup>6</sup>, Ehab Tousson <sup>2</sup>, Ashraf Abdelghany <sup>7</sup> and Saori Furuta <sup>1,\*</sup>

**Table S1.** MiRNAs implicated in lung carcinogenesis with their target genes.

| miRNA     | Function                                                                        | Target Genes                                                  | References |
|-----------|---------------------------------------------------------------------------------|---------------------------------------------------------------|------------|
| miR-15a   | regulates proliferation and apoptosis                                           | Bcl-2, CCND1, Cyclin E1, VEGF                                 | [1,2]      |
| miR-16    | regulates proliferation and apoptosis                                           | Bcl-2, CCND1, Cyclin E1, VEGF                                 | [3,4]      |
| miR-17-5p | Promotes proliferation and inhibits apoptosis                                   | PTEN, BIM, E2F1, Cyclin D1, TP53INP1, LKB1/STK11, TIMP2, ZEB1 | [5-10]     |
| miR-21    | promotes proliferation, invasion, and metastasis                                | PTEN, PDCD4, TIMP3, RECK                                      | [11,12]    |
| miR-23a   | regulates apoptosis and cell cycle                                              | Bcl-2, PTEN, Cyclin D1, CDK6, TET1, GLS2, ST7                 | [13-18]    |
| miR-34a   | Induces apoptosis and inhibits metastasis                                       | Bcl-2, SIRT1, MET, E2F3                                       | [19,20]    |
| miR-92a   | promotes proliferation and angiogenesis                                         | PTEN, TIMP3, FZD4, SFRP1                                      | [21,22]    |
| miR-96    | promotes proliferation and inhibits apoptosis                                   | FOXO1, KRAS, Bcl-2, Cyclin D1                                 | [23,24]    |
| miR-106a  | Promotes proliferation and inhibits apoptosis                                   | PTEN, BIM, E2F1, Cyclin D1                                    | [25,26]    |
| miR-126   | regulates angiogenesis and tumor progression                                    | PIK3R2, KRAS, EGFL7, SPRED1                                   | [27-29]    |
| miR-133b  | inhibits proliferation and invasion                                             | FSCN1, ROCK1, EGFR, VEGF                                      | [30,31]    |
| miR-135b  | Promotes proliferation and migration                                            | APC, CDKN1B, Cyclin D1, JAK2                                  | [32,33]    |
| miR-146a  | can regulate NF- $\kappa$ B, the Wnt/ $\beta$ -catenin, and the EGFR pathway    | EGFR, ROCK1, Numb, Notch1, IRAK1                              | [34-38]    |
| miR-155   | enhances tumor growth and metastasis                                            | TP53INP1, SOCS1, SHIP1, FOXO3a, E2F2                          | [39-44]    |
| miR-182   | regulating cell proliferation, apoptosis, migration                             | FOXO1, KLF4, MTSS1, HIF1 $\alpha$                             | [45-48]    |
| miR-183   | Promotes proliferation and migration                                            | EGR1, RASA1, ITGB1, EZH2, E2F3, PTEN, FOXO1, MTDH             | [49-52]    |
| miR-184   | tumor suppressor by regulating proliferation, apoptosis, migration and invasion | c-Myc, EZH2, SOX9, Wnt7b                                      | [53-57]    |
| miR-195   | regulate several key cellular                                                   | Bcl-2, Cyclin D1, IRS1, VEGF,                                 | [58-62]    |

|              |                                                                                                        |                                          |           |
|--------------|--------------------------------------------------------------------------------------------------------|------------------------------------------|-----------|
|              | processes, including cell proliferation, apoptosis, migration, and invasion                            | Akt                                      |           |
| miR-200      | regulate cell proliferation, apoptosis, and epithelial-mesenchymal transition (EMT)                    | ZEB1, ZEB2, SIRT1, BMI1, TGFBR2 GATA3,   | [63-66]   |
| miR-196a2    | significantly elevated the risk of lung cancer                                                         | HOXC8, ANXA1, ETS1,BCL2                  | [67-69]   |
| miR-4782 -3p | associated with tumor progression and metastasis                                                       | MARCH5, TRIM44, NDUFA4, SLC2A1.          | [70-72]   |
| miR-210      | regulate various cellular processes, such as cell proliferation, apoptosis, and angiogenesis.          | EFNA3, TP53INP1, RAD52                   | [73-75]   |
| miR-452-5p   | Promote cellular proliferation, migration and invasion of lung cancer                                  | IGF2BP1, MMP9, SIRT1                     | [76-78]   |
| miR-423      | Promote the proliferation and invasion of lung cancer                                                  | GRHL2, FOXO3, CASTOR1                    | [79-81]   |
| miR-486      | inhibits cell proliferation, invasion and migration                                                    | TENM1, PIK3R1, FOXM1TGFBR1, ZBTB7A       | [82-84]   |
| miR-608      | act as a tumor suppressor by targeting various oncogenes and signaling pathways.                       | ZEB1, TP63 , MCL1, TGFBR2                | [85-89]   |
| miR-32       | promote lung cancer cell proliferation, migration, and invasion                                        | PTEN, SLC45A3, E2F2, TP53, FOXO1, KLF4   | [90-93]   |
| miR-27a      | tumor Suppressor and regulates non-small cell Lung cancer cell proliferation                           | HOXB8 – PMC, CDKN1B, PTEN, ZBTB10, SPRY2 | [94-96]   |
| miR-196a     | regulation of apoptosis and inflammation,                                                              | HOXA5, ANXA1, CDK6, FOXO1                | [97-99]   |
| miR-545      | suppresses cell proliferation by directly targeting cyclin D1 and CDK4 genes in lung cancer cell lines | cyclin D1, CDK4, TP53INP1, ZEB2          | [100-103] |
| miR-193a-3p  | inhibit cell proliferation, migration, and invasion of lung cancer                                     | SRSF2, HMGB1, RPS6KA3, MCL1              | [104-107] |
| miR-31       | tumor suppressive and oncogenic functions in lung cancer                                               | LATS2, SATB2, ITGA5 , FLOT1              | [108-110] |
| miR-124      | promotes lung cancer cell proliferation, migration, and invasion                                       | EZH2, ROCK1, CDK4                        | [111-113] |
| miR-125a-5p  | regulate cell proliferation, migration and apoptosis                                                   | ERBB2/HER2, LIN28B, Mcl-1                | [114-118] |
| miR-204-5p   | inhibits cell proliferation, migration and has anti-oncogene effects                                   | CXCR4, BCL2, FOXP1, HMGA2, USP47,        | [119-122] |
| miR-145      | regulates tumor growth, invasion, and metastasis,                                                      | c-Myc, FSCN1, MUC1, EGFR                 | [123-125] |

|          |                                                                                                 |                            |           |
|----------|-------------------------------------------------------------------------------------------------|----------------------------|-----------|
| miR-20a  | promotes lung cancer cell proliferation and invasion                                            | RUNX3, PTEN, AKT2          | [126-128] |
| miR-25   | promotes cell proliferation and inhibits apoptosis in non-small cell lung cancer cells          | BTG2F, BXW7, SMAD7         | [129-132] |
| miR-375  | act as a tumor suppressor by inhibiting cell proliferation, migration, and invasion             | AEG-1, YAP1, JAK2, AURKA   | [133,134] |
| miR-148b | regulation of several genes and pathways that are crucial for cancer progression and metastasis | WISP2, FGF9, VEGFA, PIK3R1 | [135-139] |
| miR-422a | regulate cell growth and cell cycle                                                             | KRAS, CDK4, SP1            | [140-145] |

**Table S2.** miRNAs involved in lung carcinogenesis upon exposure to arsenic and BaP.

| MiRNA   | Function         | Target genes                    | Expression level | References |
|---------|------------------|---------------------------------|------------------|------------|
| miR-21  | Oncogene         | PTEN, PDCD4, TPM1, RECK         | Upregulated      | [146-148]  |
| miR-31  | Oncogene         | NOTCH1, SPARC, SATB2            | Upregulated      | [149-151]  |
| miR-34a | Tumor suppressor | Notch1, Bcl-2, c-Myc, Cyclin D1 | Downregulated    | [152-154]  |
| miR-126 | Tumor suppressor | PI3K/AKT, KRAS, EGFL7           | Downregulated    | [155-157]  |
| miR-143 | Tumor suppressor | KRAS, ERK5                      | Downregulated    | [158,159]  |
| miR-145 | Tumor suppressor | OCT4, SOX2, KLF4                | Downregulated    | [160-162]  |
| miR-155 | Oncogene         | RHOA, SOCS1, TGFB2              | Upregulated      | [163-165]  |
| miR-200 | Tumor suppressor | ZEB1, ZEB2                      | Downregulated    | [166-168]  |
| miR-205 | Tumor suppressor | ZEB1, ZEB2                      | Downregulated    | [169-171]  |
| miR-214 | Oncogene         | PTEN, PDCD4, TPM1               | Upregulated      | [172-174]  |

**Table S3.** The signaling pathways in lung carcinogenesis are subject to regulation by miRNAs.

| Signaling Pathway | Involved miRNAs                                                                          | Mechanism                                                                          | References |
|-------------------|------------------------------------------------------------------------------------------|------------------------------------------------------------------------------------|------------|
| Wnt               | miR-34a, miR-122, miR-135a/b, miR-148a/b, miR-200c, miR-375                              | Regulation of cell proliferation, differentiation, and apoptosis                   | [175-180]  |
| TGF- $\beta$      | miR-21, miR-29, miR-34, miR-122, miR-155, miR-200, miR-335                               | Regulation of cell differentiation, migration, and apoptosis                       | [181-183]  |
| Notch             | miR-34, miR-122, miR-150, miR-200, miR-326, miR-449, miR-708                             | Regulation of cell fate determination, differentiation, and proliferation          | [184-188]  |
| Hedgehog          | miR-125b, miR-324-5p, miR-326, miR-330-3p, miR-494, miR-615-3p, miR-744                  | Regulation of cell proliferation, differentiation, and survival                    | [189-191]  |
| PI3K/Akt          | miR-7, miR-21, miR-34, miR-126, miR-143, miR-145, miR-155, miR-221/222, miR-302, miR-375 | Regulation of cell growth, survival, and metabolism                                | [192-198]  |
| MAPK/ERK          | miR-21, miR-34, miR-143, miR-146a, miR-150, miR-155, miR-221/222, miR-424, miR-503       | Regulation of cell proliferation, differentiation, and survival                    | [199-207]  |
| JAK/STAT          | miR-21, miR-23a, miR-29, miR-30, miR-126, miR-155, miR-223, miR-451                      | Regulation of cell growth, differentiation, and immune response                    | [208-215]  |
| NF- $\kappa$ B    | miR-9, miR-21, miR-34, miR-146, miR-155, miR-221/222, miR-223, miR-301, miR-365          | Regulation of inflammation, cell survival, and immune response                     | [216-224]  |
| Hippo             | miR-125b, miR-200c, miR-429, miR-21, miR-34a                                             | Regulation of Hippo pathway genes, cell proliferation, and apoptosis               | [225-229]  |
| Tp53              | miR-34a, miR-125b, miR-192, miR-145, miR-155                                             | Regulation of Tp53 and Tp53 target genes, cell cycle arrest, apoptosis, senescence | [230-234]  |
